# Supplementary material for: Volatile organic compounds (VOCs) in photochemically aged air from the eastern and western Mediterranean
Source: Copernicus journal article supplement (doi:10.5194/acp-17-9547-2017), 2017-08-09
Supplement: Supplementary file [file acp-17-9547-2017-supplement-title-page.pdf › acp-17-9547-2017-supplement-title-page.pdf]

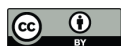

## *Supplement of*

# **Volatile organic compounds (VOCs) in photochemically aged air from the eastern and western Mediterranean**

**Bettina Derstroff et al.**

*Correspondence to:* Bettina Derstroff ([bettina.derstroff@mpic.de](mailto:bettina.derstroff@mpic.de)) and Jonathan Williams ([jonathan.williams@mpic.de](mailto:jonathan.williams@mpic.de))

- [acp-17-9547-2017-supplement-title-page.pdf](#)
- [Supplement\\_VOC\\_Derstroff\\_etal\\_20170614](#)
  - PTR\_TOF\_MS\_data
    - \* [Acetaldehyde\\_PTRTOFMS\\_Derstroff\\_MPIC\\_1min.txt](#)
    - \* [Acetic\\_acid\\_PTRTOFMS\\_Derstroff\\_MPIC\\_1min.txt](#)
    - \* [Read\\_me\\_VOCdata\\_PTRTOFMS\\_Derstroff\\_MPIC.pdf](#)
    - \* [VOC\\_PTRTOFMS\\_Derstroff\\_MPIC\\_10min.txt](#)
    - \* [VOC\\_PTRTOFMS\\_Derstroff\\_MPIC\\_1min.txt](#)
  - [SupplementS1-S4.pdf](#)
  - [SupplementS5.pdf](#)

The copyright of individual parts of the supplement might differ from the CC BY 3.0 License.
